# Supplementary material for: Engineering linker defects in functionalized UiO-66 MOF nanoparticles for oil-in-water Pickering emulsion stabilization
Source: Royal Society of Chemistry journal article supplement (doi:10.1039/d3dt01470c), 2023-01-01
Supplement: d3dt01470c1.pdf [file d3dt01470c1.pdf]

**Electronic Supplementary Information (ESI) for**

**Engineering linker defects in functionalized UiO-66 MOF nanoparticles for oil-in-water Pickering emulsion stabilization**

Mostakim SK<sup>‡</sup>, Salini Kar<sup>‡</sup>, Jayant K Dewangan and Mithun Chowdhury\*

Lab of Soft Interfaces, Department of Metallurgical Engineering & Materials Science,  
Indian Institute Technology Bombay, Mumbai 400076, India

\* To whom correspondence should be addressed: MC, E-mail: mithunc@iitb.ac.in

<sup>‡</sup>Contributed equally (MSK, SK)

**Material and methods**

All the chemicals and organic solvents, ZrOCl<sub>2</sub>·8H<sub>2</sub>O (99.8 % Loba Chemie), Palmitic acid (99.5 %, Loba Chemie), DMF (99.5 % Loba Chemie), n-heptane (99.9 %, Loba Chemie), Methanol (99.9 %, HPLC, Loba Chemie), terephthalic acid (99.5 %, Loba Chemie), glacial acetic acid (99.8 % Loba Chemie), and CHCl<sub>3</sub> (99.9 %, Loba Chemie), were collected from the near chemical supplier and used as received. The organic solvents were used carefully.

The phase purity of the **UP** and **UM** was investigated using an X-ray powder diffraction (XRPD) measurement, PANalytical Empyrean instrument utilizing Cu K $\alpha$  radiation ( $\lambda = 1.54184 \text{ \AA}$ ) from 5 to 50°. The FT-IR (Fourier transform infrared spectra) spectra of all compounds were recorded in the range 450-4000  $\text{cm}^{-1}$  by Perkin Elmer FT-IR spectrometer to verify the spectral changes. The thermal stability of **UP** and **UM** was measured under N<sub>2</sub> flow using an SDT Q600 V20.9 Build 20 in the temperature range of 25-700 °C. The proton <sup>1</sup>H-NMR of the digest compounds in HF-DMSO-d<sub>6</sub> was conducted by a Bruker 500 MHz. The BET surface area of all compounds was determined using a Quantachrome Autosorb iQMP gas sorption analyzer at -196 °C. The water-air contact angles were taken using a contact-angle goniometer (Dataphysics, model OCA15SEC). The homogeneous Pickering emulsion was made by a High Torque Stirrer mixture, model BDC6015, Caframo, USA. The microscopic images were collected by an Olympus BX53M microscope. The solid, stable emulsion droplets were viewed using a scanning electron microscope (SEM) (Hitachi S-3400N). A cryo high-resolution transmission electron microscope (HRTEM) (JEOL, JEM 2100) instrument was used to analyze the emulsion. The TEM images of MOF and emulsion droplets were collected using a TEM instrument (Thermo Scientific, Themis 300 G3). The elemental analysis of MOF and emulsion droplet was measured using a FESEM instrument (JEOL-JSM7600F). All the rheological studies were investigated by an Anton Paar Rheometer (model: Physica MCR702) with a parallel plate measuring system (PPMS) at ambient temperature. The zeta potential of all compounds was determined using a Zetasizer Nano ZS90 (model no. ZEN3690) instrument. The yield of the synthesized MOFs was calculated according to the following procedure outlined at the end of this ESI.<sup>a</sup> The AC electrical conductivity of the Pickering emulsions stabilized by **UP** was measured using a broadband dielectric spectrometer (Novocontrol Technologies, Germany, Concept 80) with an Alpha A analyzer at room temperature. The measurements were conducted within a frequency range of 10<sup>-1</sup> to 10<sup>8</sup> Hz.

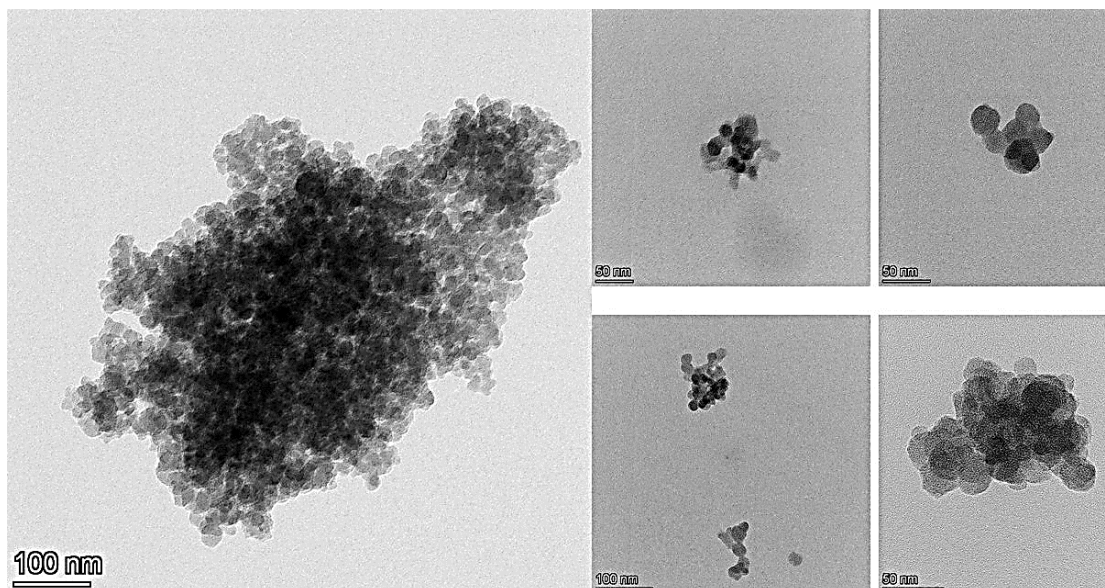

**Figure S1.** TEM images of UP<sup>1</sup>.

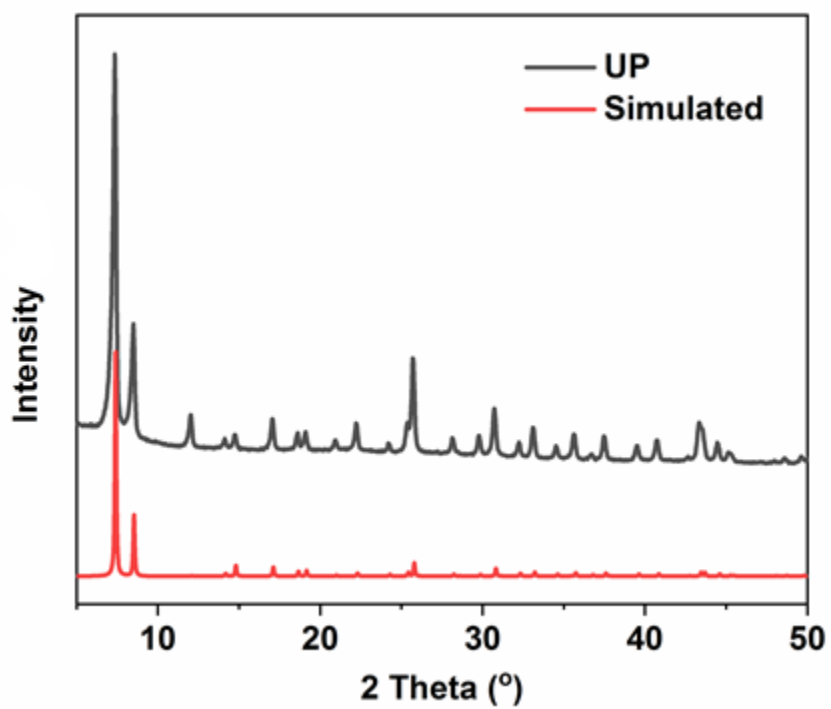

**Figure S2.** Comparison of PXR D pattern of both as-synthesized (UP) and simulated PXR D of UiO-66 MOF. The simulated PXR D data were collected from the previous literature<sup>1</sup>.

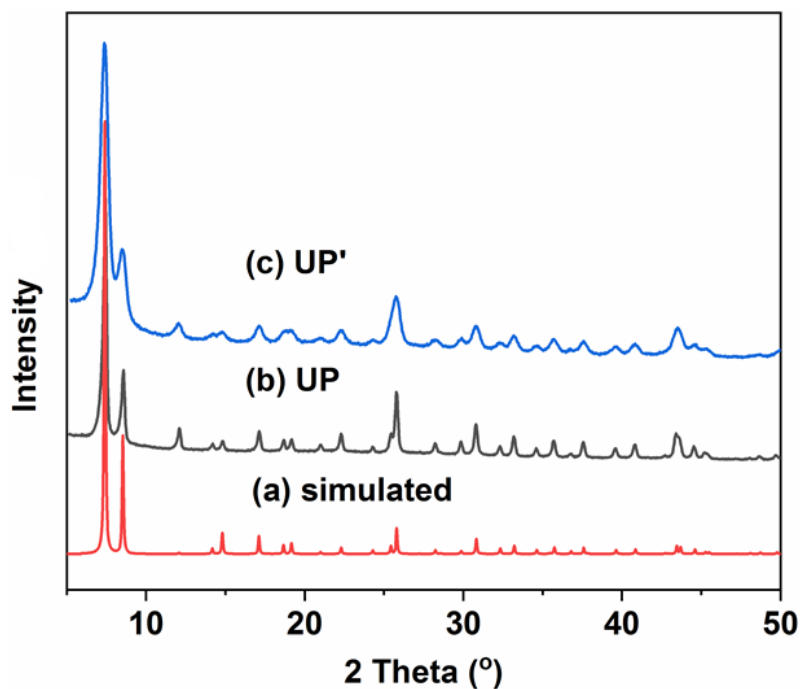

**Figure S3.** PXR D patterns in different forms: (a) simulated PXR D<sup>1</sup>; (b) as-synthesized (UP); (c) activated (UP').

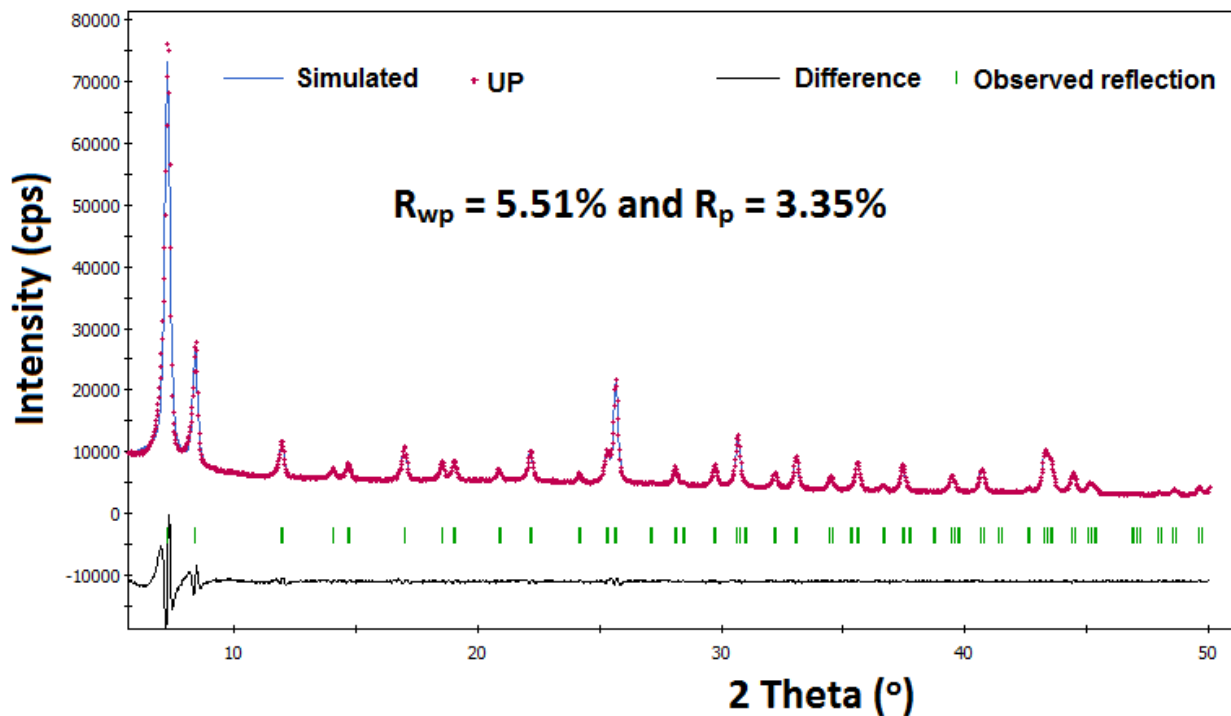

**Figure S4.** Pawley refinement of the as-synthesized UP. Red dots and blue lines denote observed and calculated patterns, respectively. The peak position and difference plot are displayed at the bottom ( $R_p = 3.35\%$ ,  $R_{wp} = 5.51\%$ ).

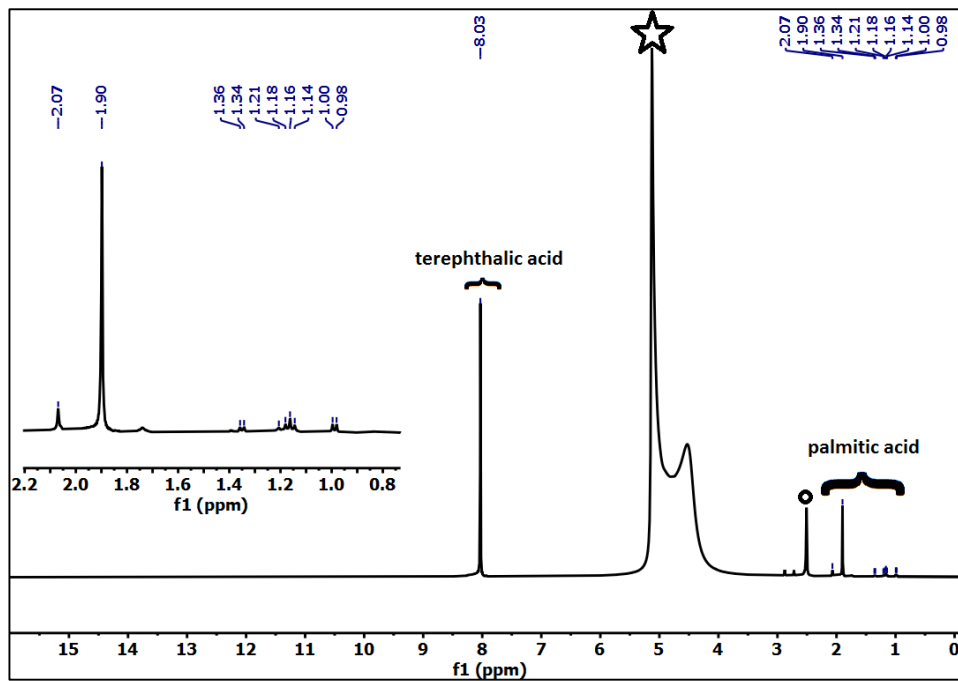

**Figure S5.**  $^1\text{H}$  NMR spectra of **UP'** after digestion in HF/DMSO- $\text{d}_6$ . The star represents the HF-H<sub>2</sub>O, and the circle denotes DMSO- $\text{d}_6$ , respectively.

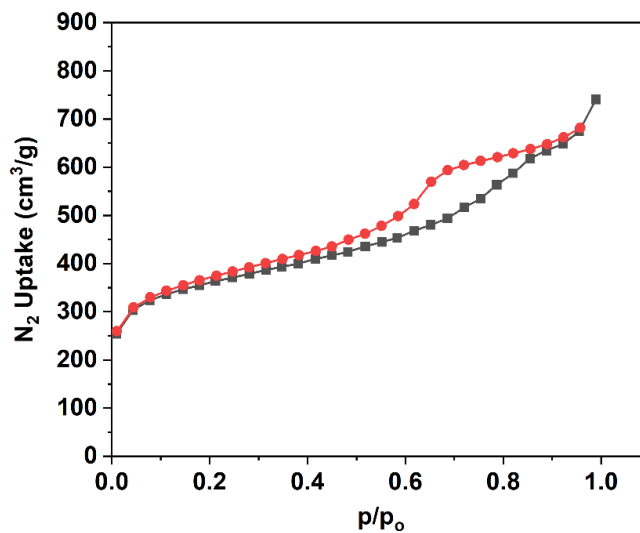

**Figure S6.**  $\text{N}_2$  sorption isotherm of **UM'** at  $-196\text{ }^\circ\text{C}$ .

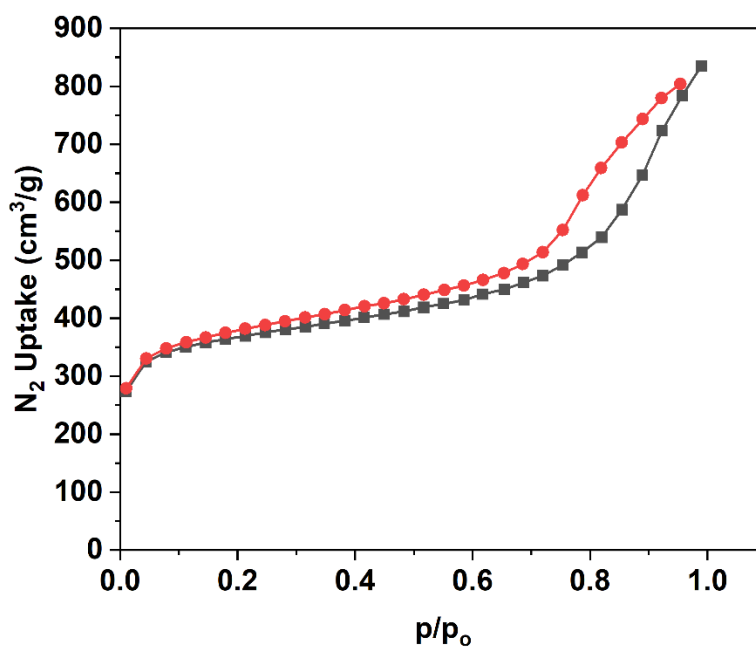

**Figure S7.** N<sub>2</sub> sorption isotherm of **UP'** at -196 °C.

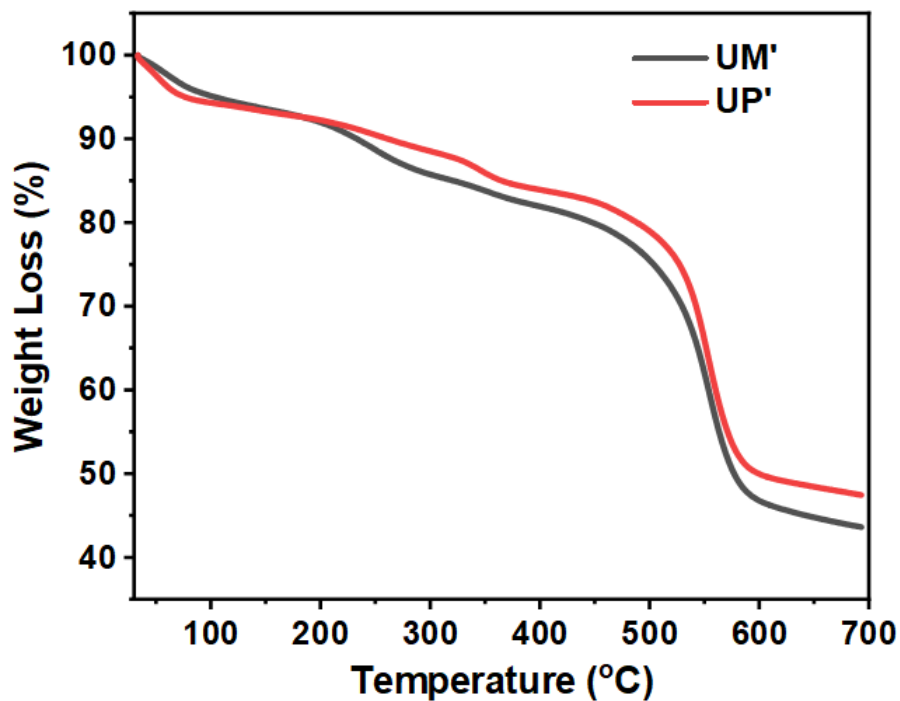

**Figure S8.** TGA scan of both activated **UP'** (red) and **UM'** (black) compounds measured under N<sub>2</sub> atmosphere (flow rate = 100 ml/min) with a heating rate of 5 °C/ min.

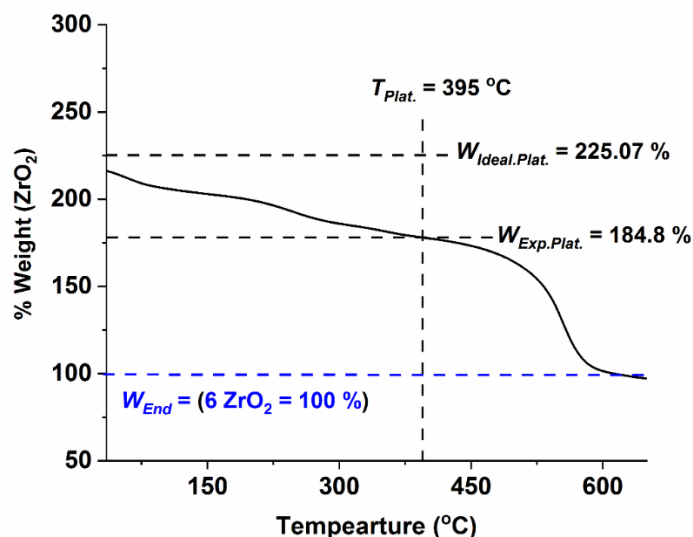

**Figure S9.** The solid curve is the TGA curve of  $UM'$  compound. Y-axis is normalized such that the end weight ( $W_{End}$ ) = 100 %. The vertical dashes line denotes  $T_{Plat.}$  (395 °C), the temperature at which the plateau ( $W_{Exp.Plat.}$  = 184.8 %) is reached. The ideal TGA plateau of  $UM'$  (without defects) is denoted by  $W_{Ideal.Plat.}$  = 225.07 %. The linker defects were found to be ~1.8. The defect was calculated according to the previous literature.<sup>2</sup>

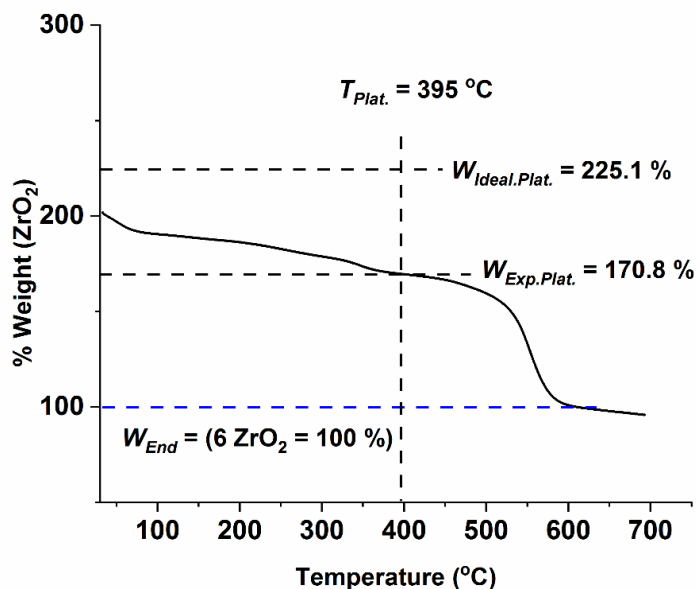

**Figure S10.** TGA scan of  $UP'$  compound (solid-curve), Y-axis is normalized such that the end weight ( $W_{End}$ ) = 100 %. The vertical dashes line denotes  $T_{Plat.}$ , (395 °C) the temperature at which the plateau ( $W_{Exp.Plat.}$  = 170.8 %) is reached. The ideal TGA plateau of  $UP'$  (without defects) is denoted by  $W_{Ideal.Plat.}$  = 225.1 %. The linker defects were found to be ~2.5. The defect was calculated according to the previous literature.<sup>2</sup>

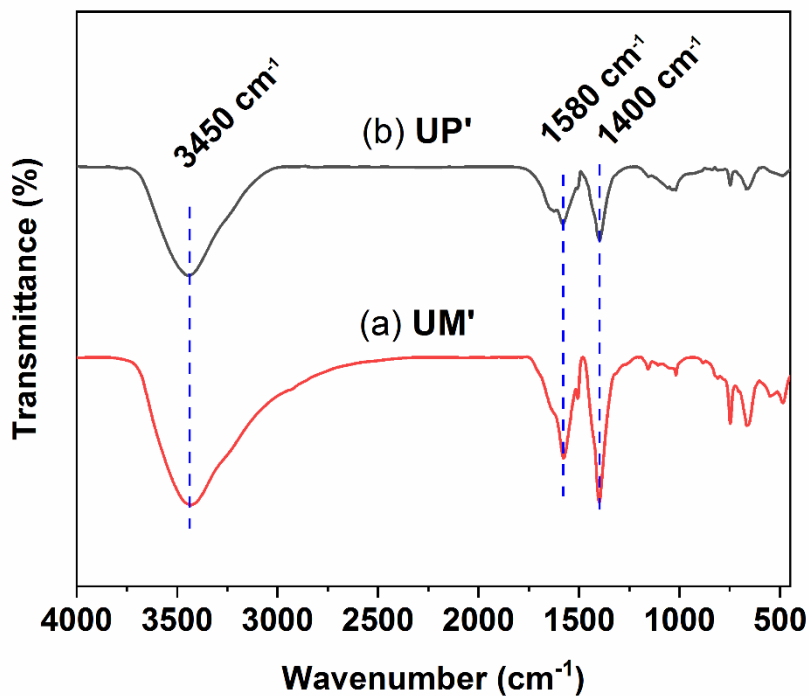

**Figure S11.** FT-IR spectra of **UP'** (black) and **UM'** (red) compounds.

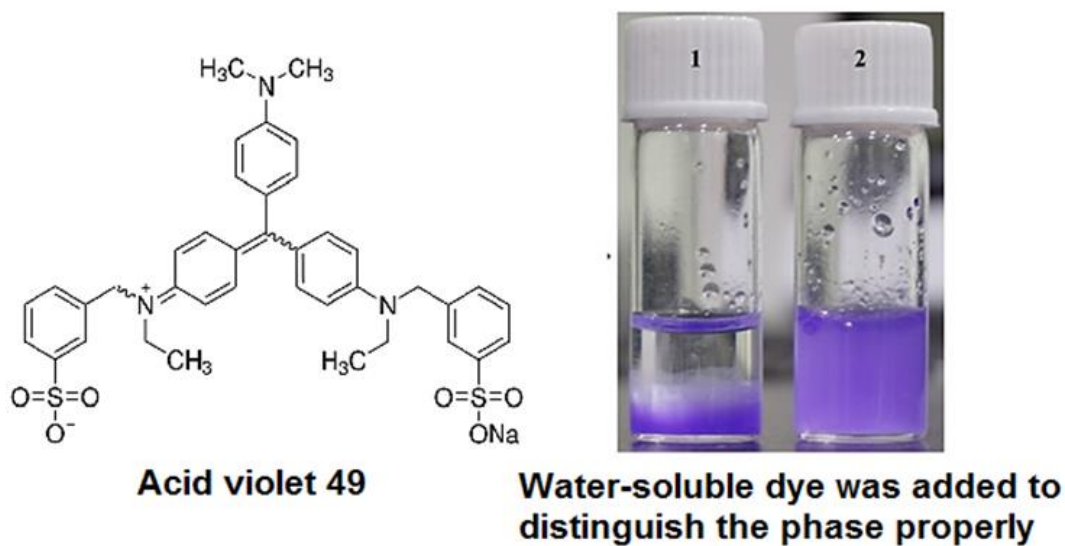

**Figure S12.** Water-soluble dye (Acid violet 49) was added to distinguish the emulsion phases properly. Vial 1 is an emulsion of **UP'** (**UP'** concentration 8.33 mg/ml) dyed with Acid violet 49, and when heptane is added, that remains separated. In vial 2, dyed emulsion diluted with water gives a well-mixed phase proving the emulsion has water in the continuous phase.



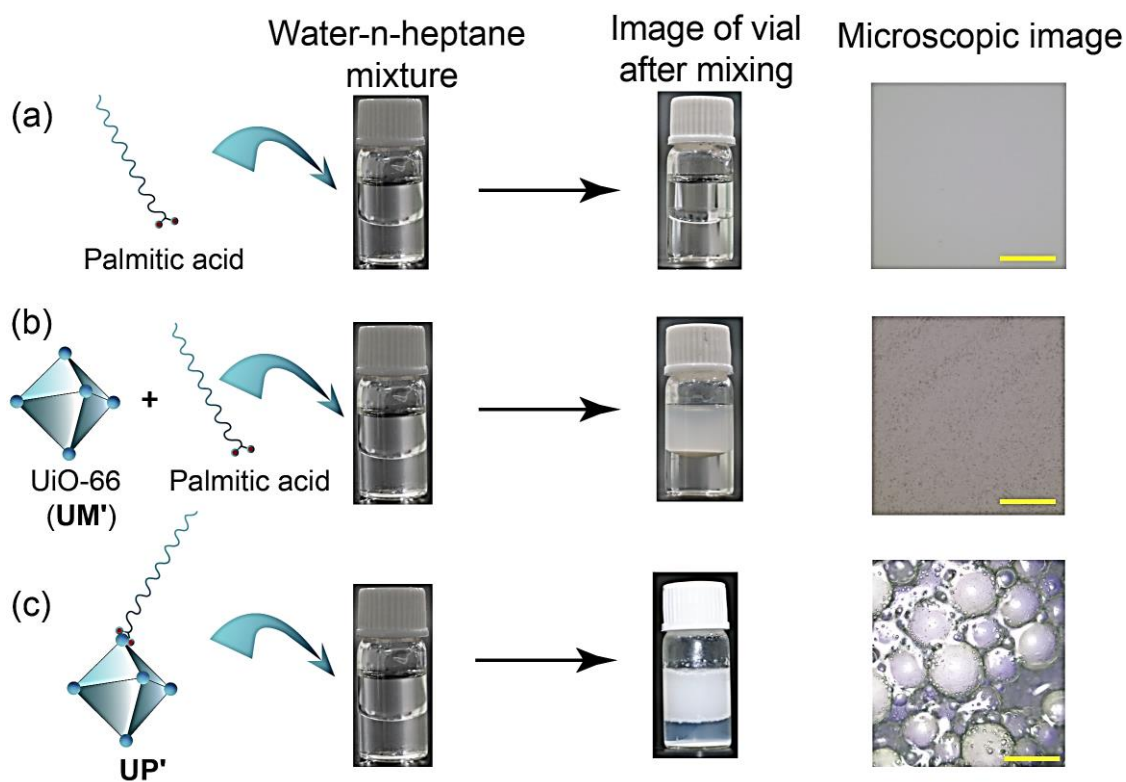

**Figure S13.** Stabilization of Pickering emulsions using different mixtures; (a) Palmitic acid (4 mg, 0.015 mmol) in water and n-heptane mixture. (b) **UM'** (25 mg, 0.015 mmol) and palmitic acid (4 mg, 0.015 mmol) mixture in water and n-heptane. (c) **UP'** (**UP'** concentration 8.33 mg/ml) in water and n-heptane mixture. Scale bar in each optical micrograph 50  $\mu\text{m}$ .

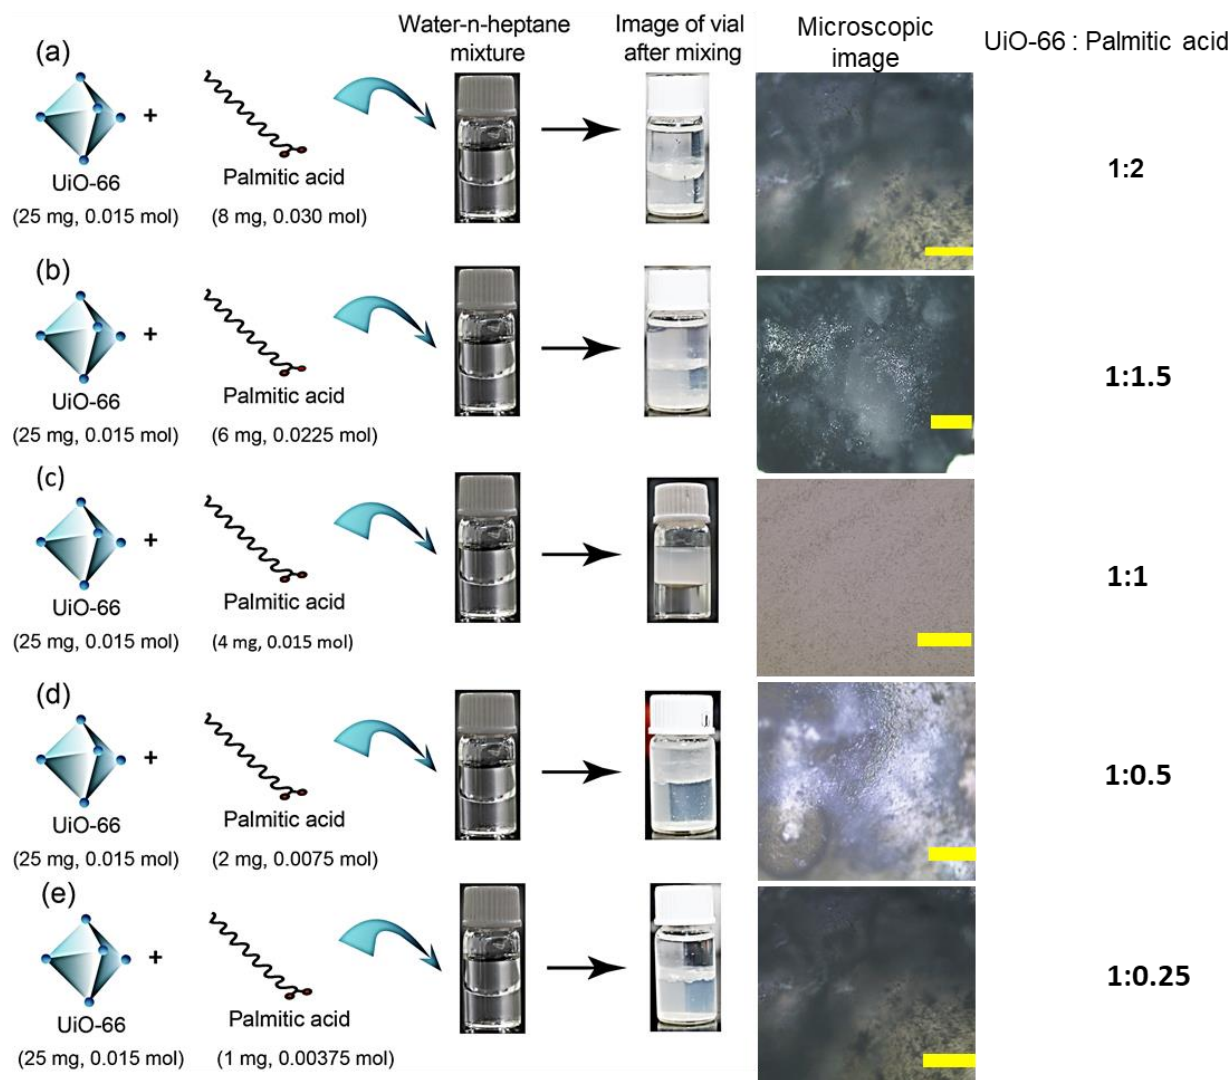

**Figure S14.** Stabilization of Pickering emulsions by using **UM'** (UiO-66) with different content of palmitic acid; (a) **UM'** (25 mg, 0.015 mmol) and palmitic acid (8 mg, 0.030 mmol) mixture in water and n-heptane mixture. (b) **UM'** (25 mg, 0.015 mmol) and palmitic acid (6 mg, 0.0225 mmol) mixture in water and n-heptane mixture. (c) **UM'** (25 mg, 0.015 mmol) and palmitic acid (4 mg, 0.015 mmol) mixture in water and n-heptane mixture. (d) **UM'** (25 mg, 0.015 mmol) and palmitic acid (2 mg, 0.0075 mmol) mixture in water and n-heptane mixture. (e) **UM'** (25 mg, 0.015 mmol) and palmitic acid (1 mg, 0.00375 mmol) mixture in water and n-heptane mixture. Scale bar in each optical micrograph = 200  $\mu$ m.

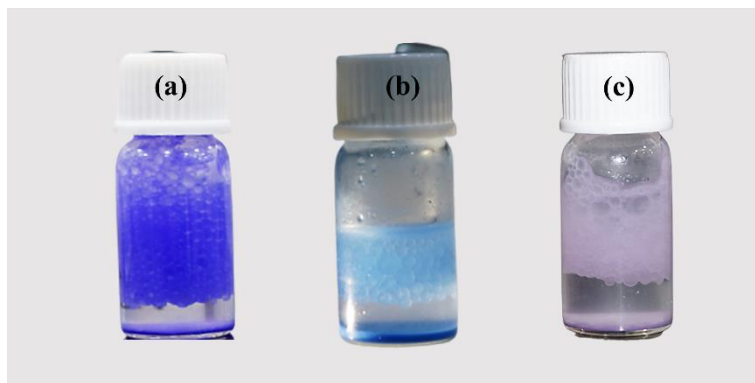

**Figure S15.** (a) Pickering emulsions of n-heptane-in-water stabilized by **UP'** MOF particles using Acid violet 49 dye. (b) Stabilized Pickering emulsions of n-heptane-in-water using Trypan blue dye. (c) Stabilized Pickering emulsions of n-heptane-in-water using Colcon dye. (Concentration of each water-soluble dye is  $0.35 \times 10^{-3}$  M).

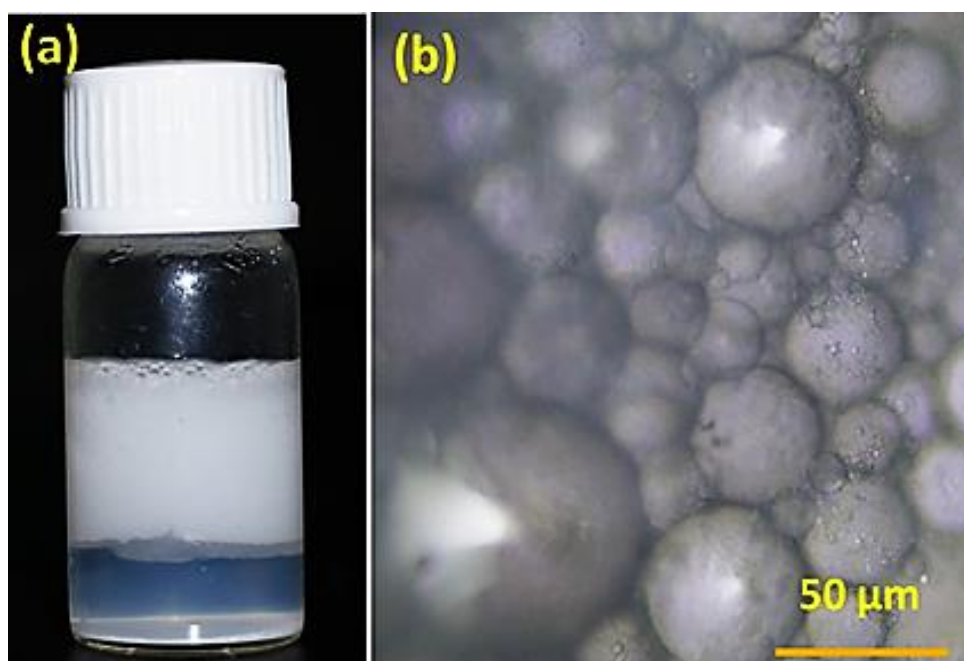

**Figure S16.** (a) Photographic image of Pickering emulsion stabilized by 25 mg **UP'** after one month. (b) Optical microscopic image of emulsion droplets as shown in (a).

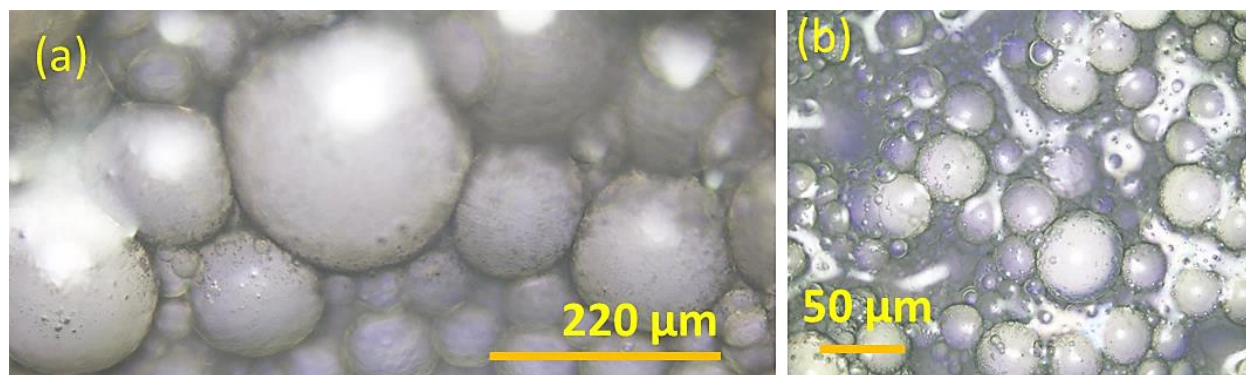

**Figure S17.** Optical microscopic images of Pickering emulsion stabilized by different content of  $UP'$ : (a) 5 mg; (b) 25 mg.

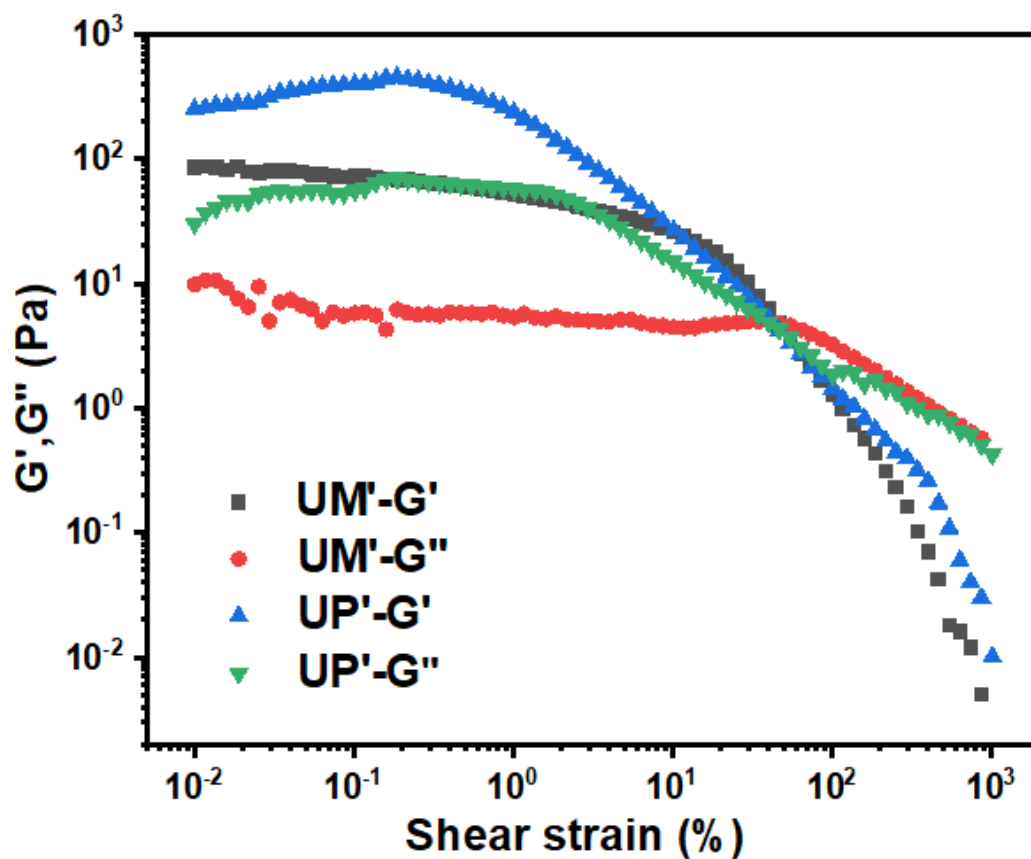

**Figure S18.** Storage moduli ( $G'$ ) and loss moduli ( $G''$ ) of the Pickering emulsions ( $UP'$  concentration 8.33 mg/ml) stabilized by different MOF compounds ( $UP'$  and  $UM'$ ) vs. % of shear strain rate. This is for oscillatory amplitude sweep, the frequency of the exciting sinusoidal signal (deformation) is kept constant at 1 Hz.

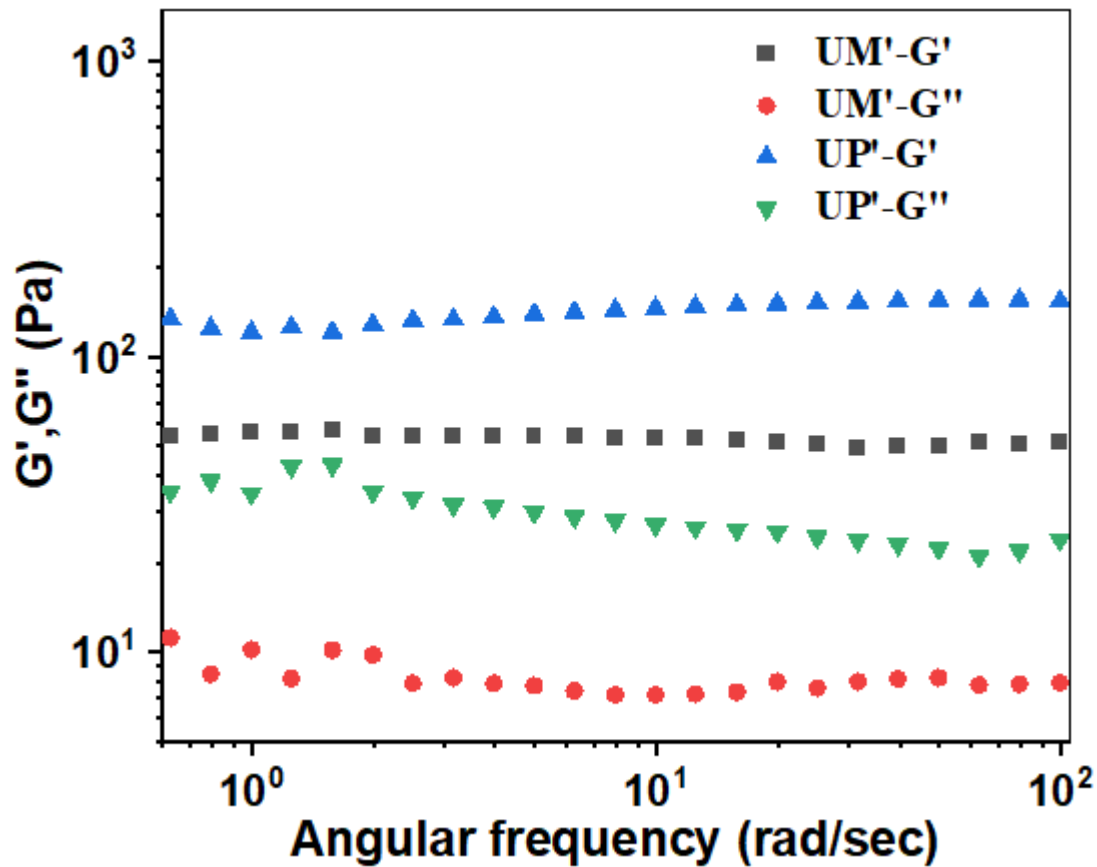

**Figure S19.** Storage moduli ( $G'$ ) and loss moduli ( $G''$ ) of the Pickering emulsions ( $UP'$  concentration 8.33 mg/ml) stabilized by different MOF compounds ( $UP'$  and  $UM'$ ) vs. angular frequency. This is oscillatory frequency sweep, where the amplitude of the sinusoidal excitation signal (deformation) is kept constant, while the frequency is varied gradually.



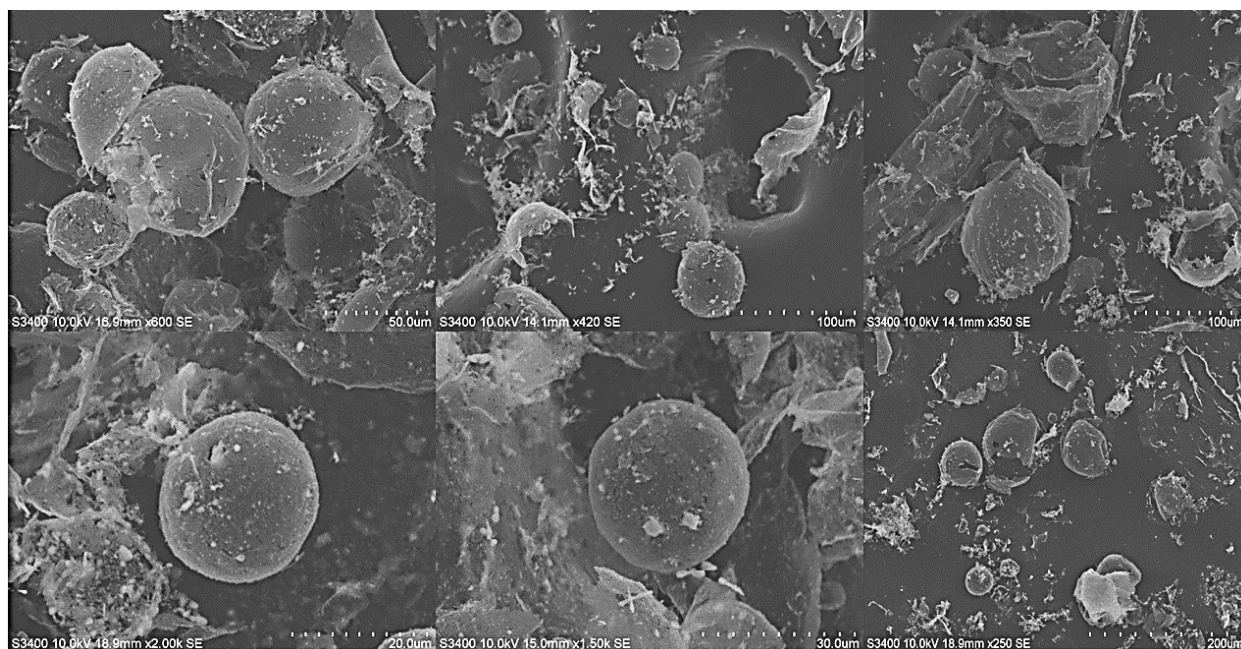

**Figure S20.** SEM images of round-shaped emulsion droplets stabilized by **UP'** (**UP'** concentration 8.33 mg/ml. Diameter of the round-shaped emulsion is ~50  $\mu\text{m}$ ). Scale bars are within each image.

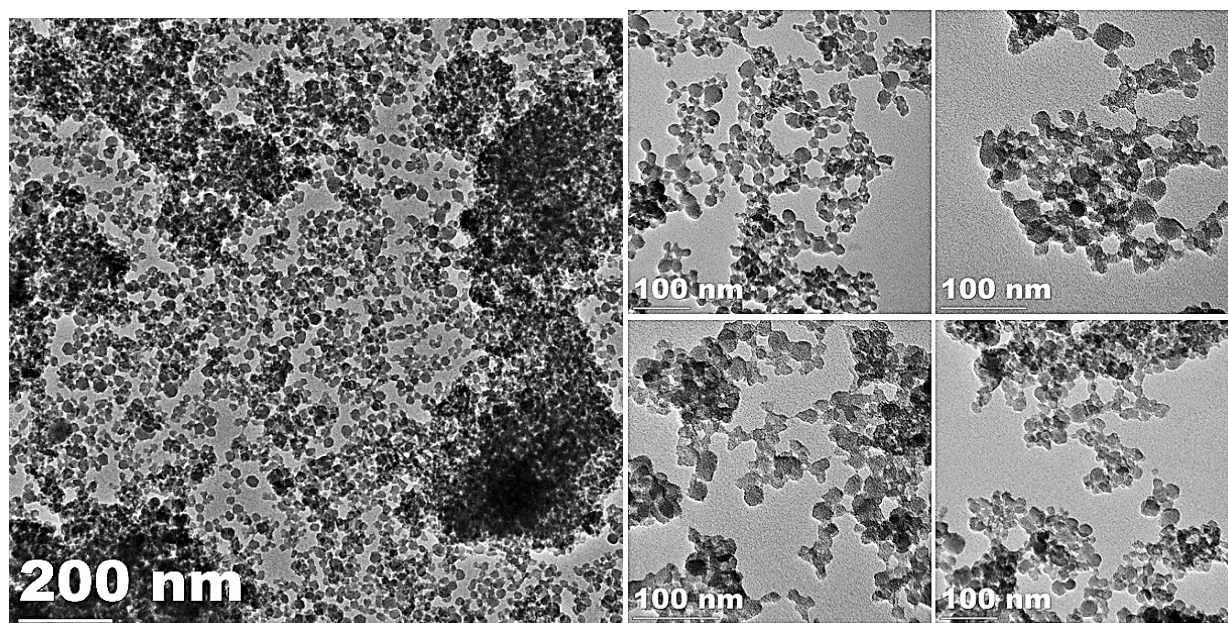

**Figure S21.** TEM images of Pickering emulsion stabilized by **UP'** (After freeze-drying). Scale bars are within each image.

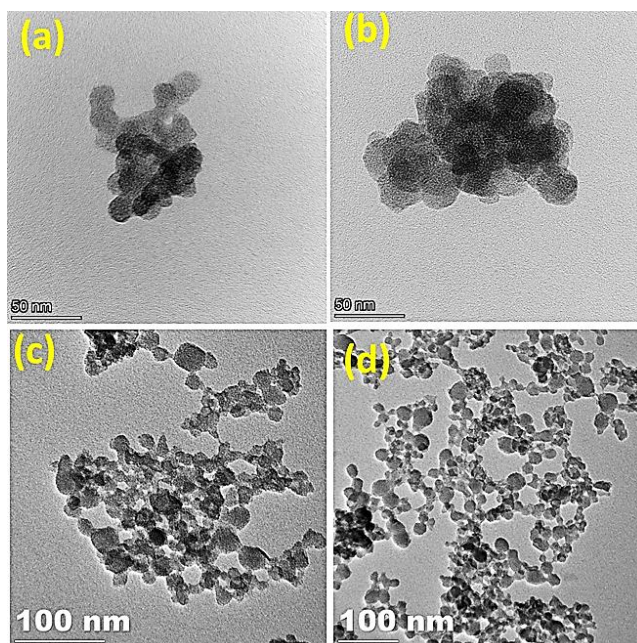

**Figure S22.** Comparison of size between particles of emulsion droplets (**UP'** concentration 8.33 mg/ml) and **UP'**: (a and b) TEM images of **UP'** before emulsion preparation. (c and d) TEM images of the Pickering emulsions stabilized by **UP'** (After freeze-drying).

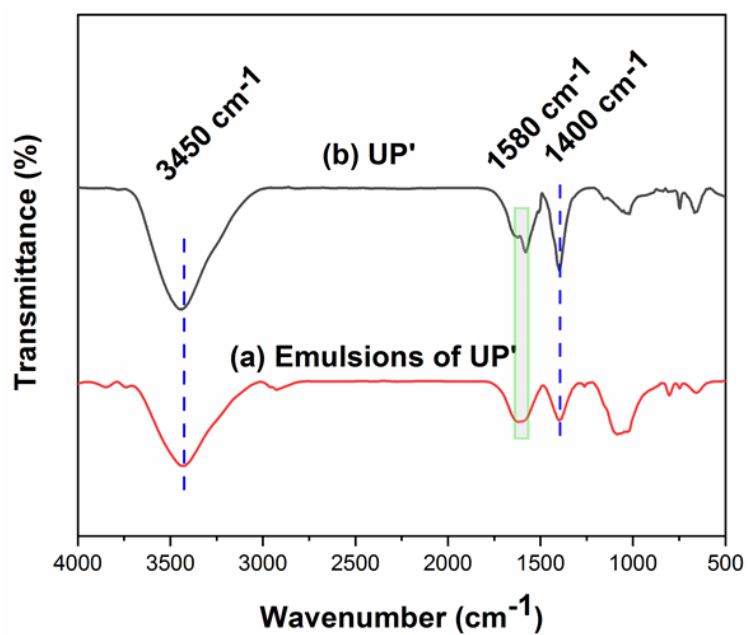

**Figure S23.** Comparison of FT-IR spectra between **UP'** (black) and dried emulsion (**UP'** concentration 8.33 mg/ml) droplet (red).

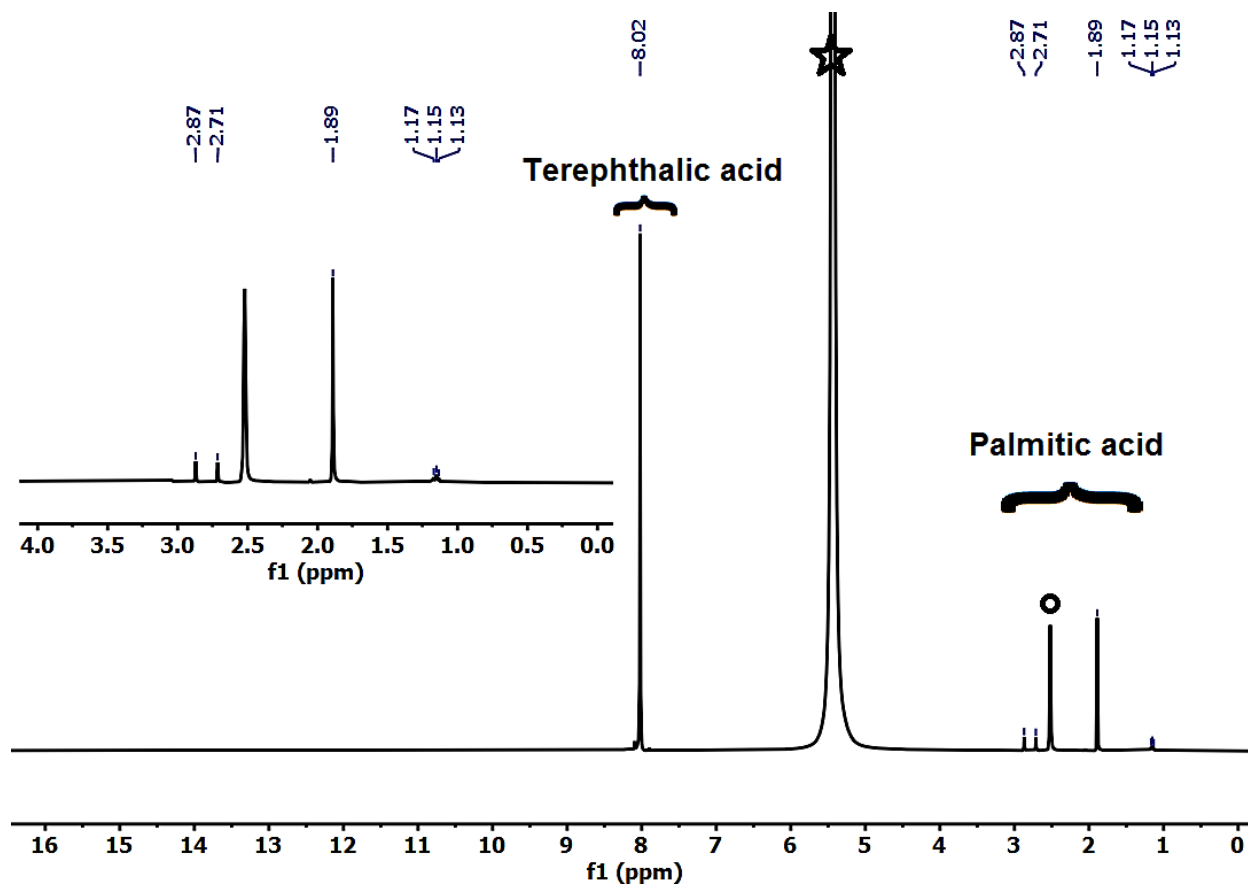

**Figure S24.** <sup>1</sup>H NMR spectra of dried emulsion (**UP'** concentration 8.33 mg/ml) droplet after digestion in HF/DMSO-d<sub>6</sub>. The star represents the HF-H<sub>2</sub>O, and circle denotes DMSO-d<sub>6</sub>, respectively.



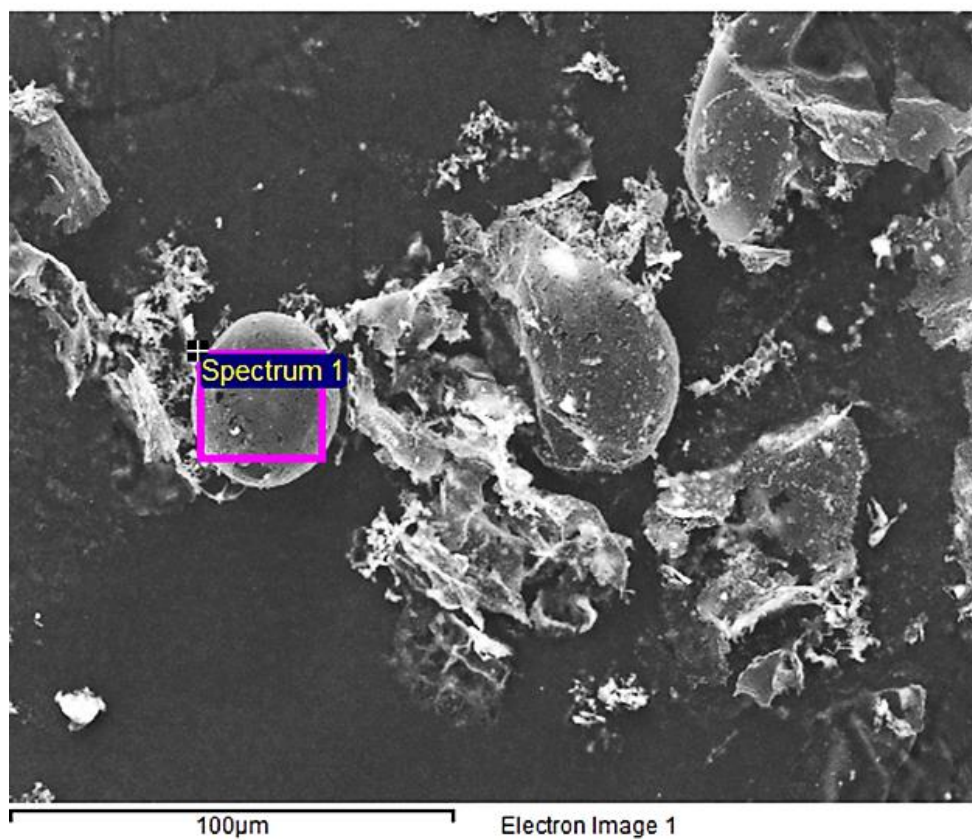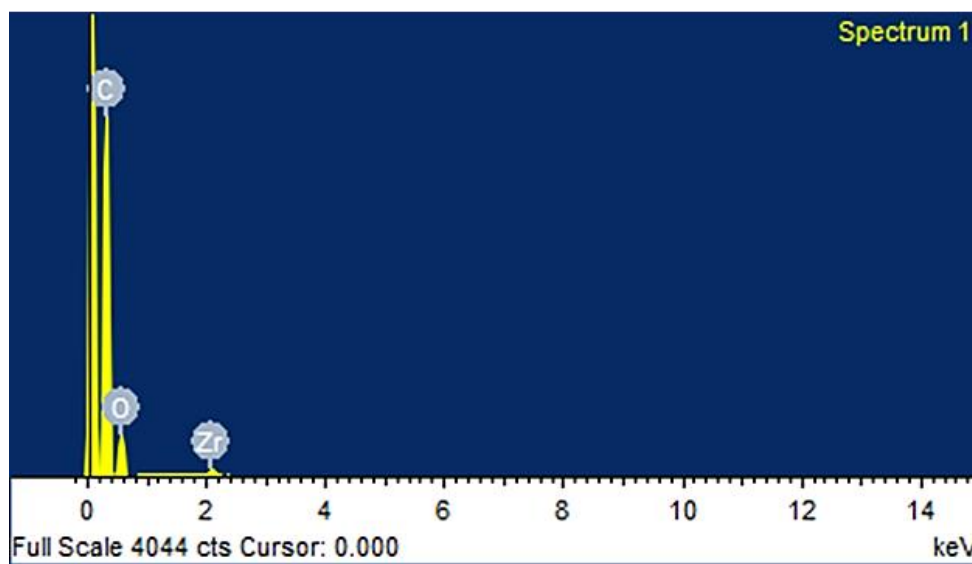

**Figure S25.** EDX spectrum of dried emulsion droplets stabilized by **UP'** (**UP'** concentration 8.33 mg/ml).

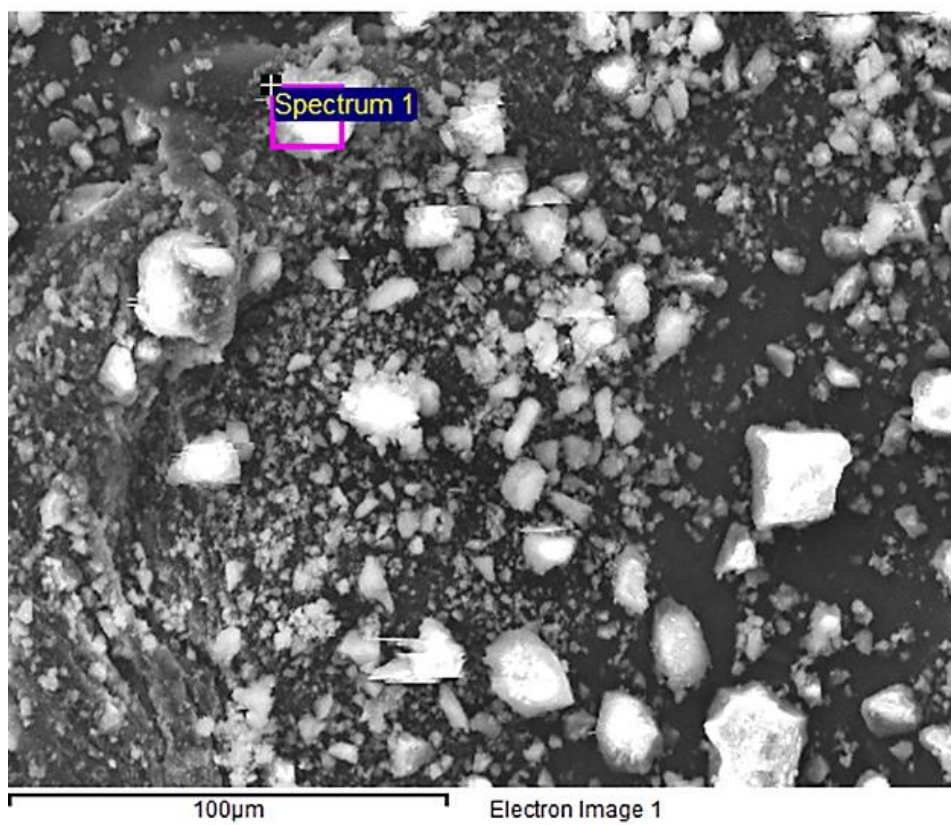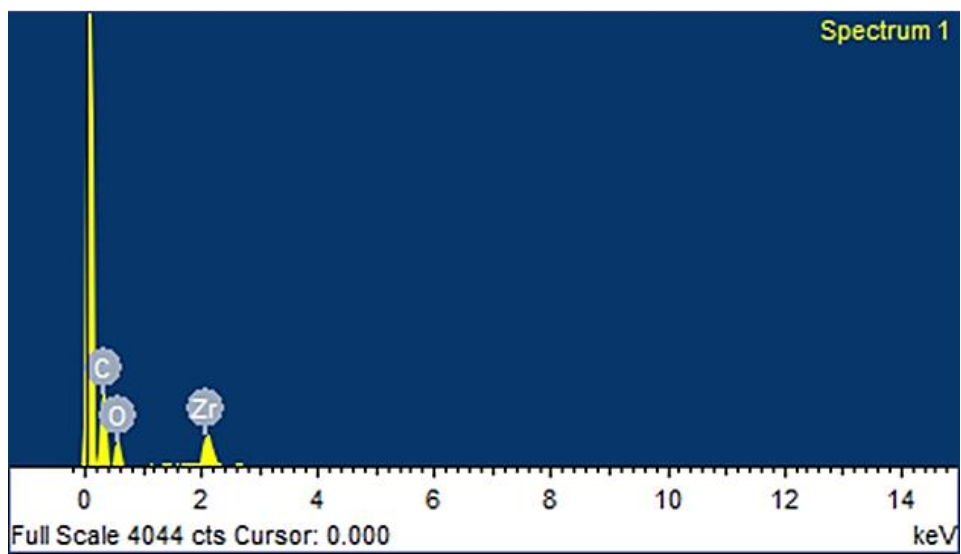

Figure S26. EDX spectrum of UP' (UP' concentration 8.33 mg/ml).

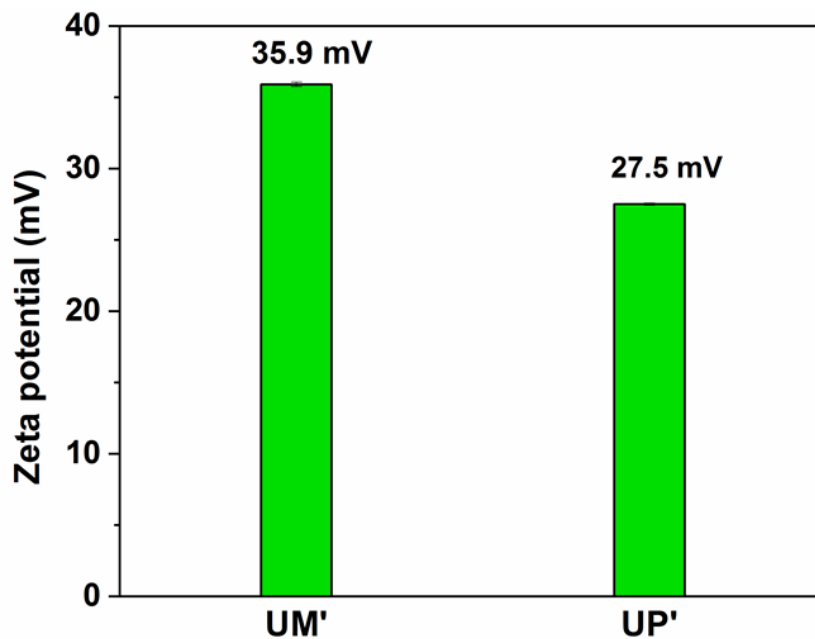

**Figure S27.** Zeta potential ( $\zeta$ ) of both **UP'** and **UM'** compounds (1 mg/ml in water) were measured at ambient temperature.

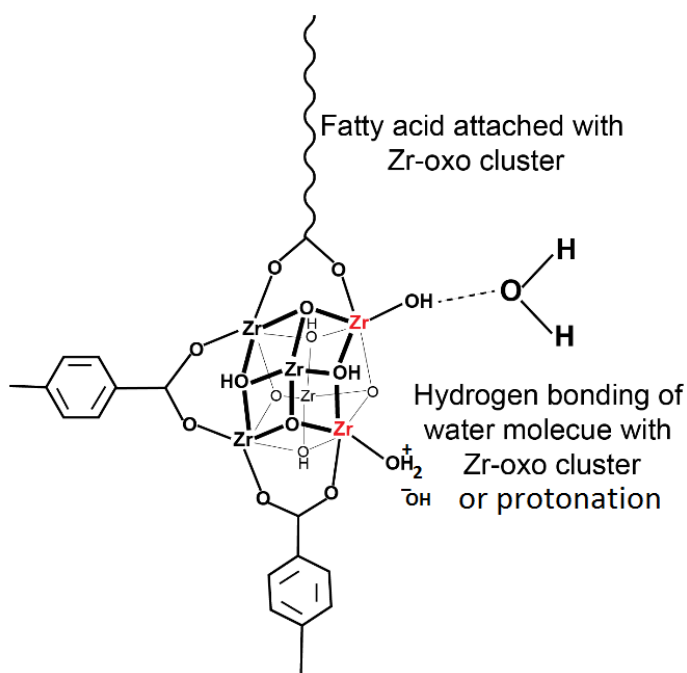

**Figure S28.** Illustration of cluster parts of the **UP'**: Water molecule interacts with Zr-oxo cluster,  $[Zr_6(OH)_4(\mu_3-O)_4(L)_{6-x}]$ , through H-bonding at the defect site ( $L$  = terephthalate and  $x$  = no. of missing linkers or no. of defects).



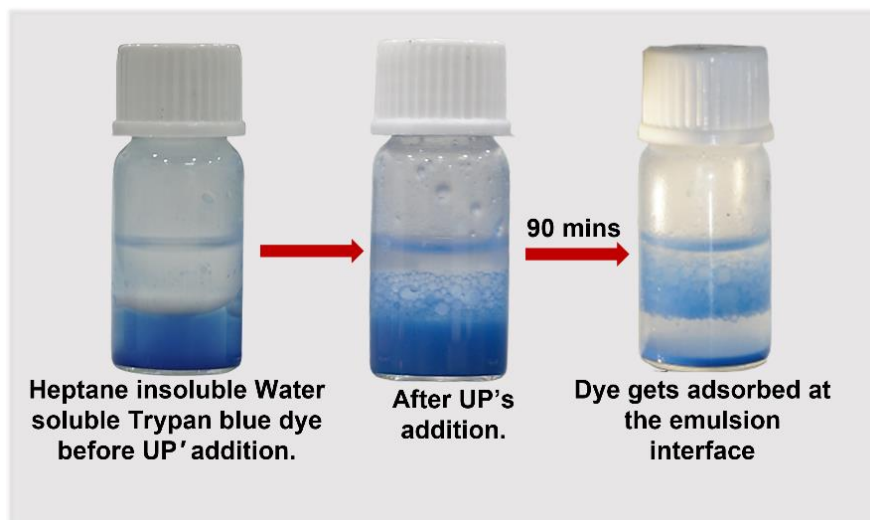

**Figure S29.** Series of images showing dye adsorption by emulsion. Initially, water-soluble Trypan blue bottom and clear upper n-heptane phase. After **UP'**s addition, emulsion starts forming. Finally, after 90 minutes of **UP'** addition, the blue-coloured dye get transferred to the emulsion phase.

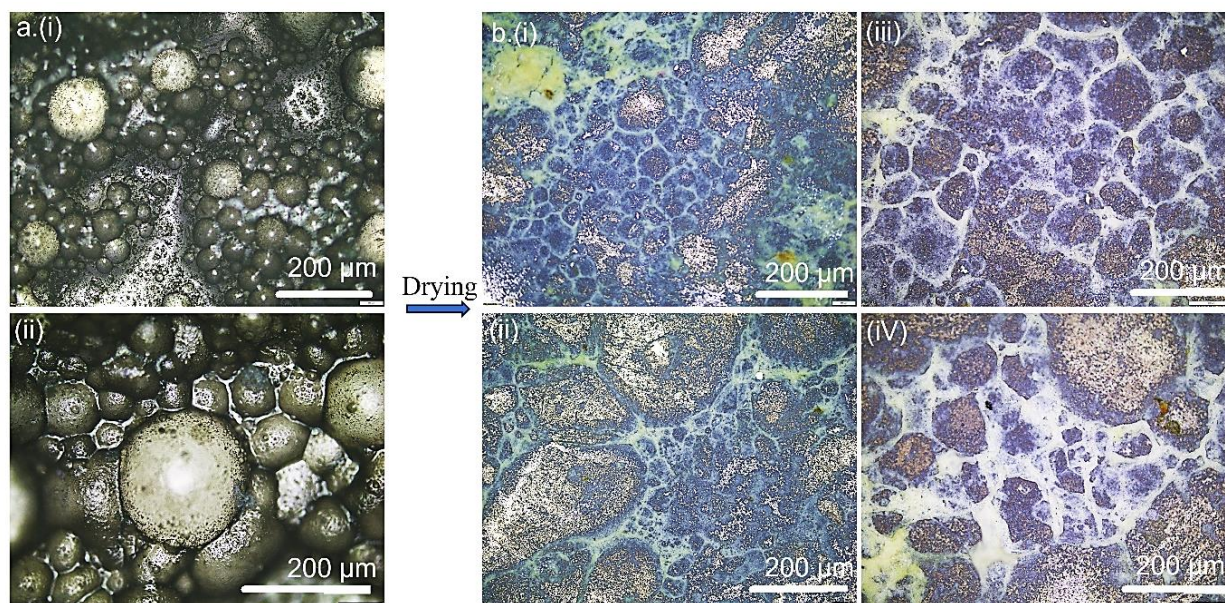

**Figure S30.** a.(i-ii) Optical microscopic images of **UP'** emulsion (**UP'** concentration 8.33 mg/ml) before drying. b.(i-iv) Continuous honeycomb pattern of leftover **UP'** particles after simple air drying of the same emulsion.

**Table S1.** Comparison of unit cell parameters of as-synthesized **UP** with reported UiO-66 MOF.

| Compound name                 | <b>UP</b>       | UiO-66 <sup>3</sup> |
|-------------------------------|-----------------|---------------------|
| Space group                   | Fm $\bar{3}$ m  | Fm $\bar{3}$ m      |
| Crystal system                | Cubic           | Cubic               |
| a = b = c (Å)                 | 20.790 (7)      | 20.7782 (7)         |
| $\alpha = \beta = \gamma$ (°) | 90              | 90                  |
| V (Å <sup>3</sup> )           | 8986.0 (22)     | 8970.7 (5)          |
| Radiation                     | Cu K $\alpha_1$ | Cu K $\alpha_1$     |
| Figure of merit (FOM)         | 35              | -                   |
| R <sub>wp</sub> (%)           | 5.51            | 6.4                 |
| R <sub>p</sub> (%)            | 3.35            | 4.9                 |

**Table S2.** Comparison of **A'** with other MOFs in the stabilization of Pickering emulsions.

| SL. No. | MOFs or MOF-composites             | Type of Pickering emulsions                     | Ref.      |
|---------|------------------------------------|-------------------------------------------------|-----------|
| 1       | HKUST-1                            | Both water-in-oil and oil-in-water              | 4         |
| 2       | ZIF-8@PS (PS = Poly-styrene)       | Oil-in-water                                    | 5         |
| 3       | Cu-BDC                             | Oil-in water                                    | 6         |
| 4       | Cu-BDC/Poly(NMA)                   | CO <sub>2</sub> -in-water                       | 7         |
| 5       | Mn <sub>3</sub> (BTC) <sub>2</sub> | CO <sub>2</sub> -in-water                       | 8         |
| 6       | Ni-BDC                             | Ionic liquid-in-water and water-in-ionic liquid | 9         |
| 7       | MIL-96 (Al)                        | Oil-in-water                                    | 10        |
| 8       | UiO-66/GO                          | Oil-in-water                                    | 11        |
| 9       | UiO-66                             | Oil-in-water                                    | 12        |
| 10      | UiO-66 and UiO-66-NH <sub>2</sub>  | Oil-in-water                                    | 13        |
| 11      | <b>UP'</b>                         | Oil-in-water                                    | This work |

**<sup>a</sup>Calculation of yield of the Synthesized MOF<sup>2,14</sup>:**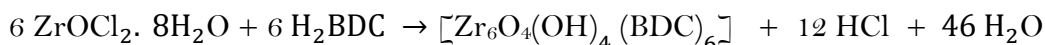

The molecular formulation of UiO-66 MOF is  $[\text{Zr}_6\text{O}_4(\text{OH})_4(\text{BDC})_6]$ . So, the 6 moles of  $\text{ZrOCl}_2 \cdot 8\text{H}_2\text{O}$  (MW: 322.25 g mol<sup>-1</sup>) will give one mole of  $[\text{Zr}_6\text{O}_4(\text{OH})_4(\text{BDC})_6]$  (MW: 1664.06 g mol<sup>-1</sup>), considering this, theoretical yield will be 86 mg. In our work, we obtained 38.7 mg of UiO-66 MOF (**UM'**) (Yield: 45%) when we used 100 mg of  $\text{ZrOCl}_2 \cdot 8\text{H}_2\text{O}$  and 50 mg of terephthalic acid. The same procedure was applied during the calculation of the yield of palmitic acid-connected UiO-66 MOF (**UP'**).

## References

- (1) Cavka, J. H.; Jakobsen, S.; Olsbye, U.; Guillou, N.; Lamberti, C.; Bordiga, S.; Lillerud, K. P. A New Zirconium Inorganic Building Brick Forming Metal Organic Frameworks with Exceptional Stability. *J. Am. Chem. Soc.* **2008**, *130*, 13850–13851.
- (2) Shearer, G. C.; Chavan, S.; Bordiga, S.; Svelle, S.; Olsbye, U.; Lillerud, K. P. Defect Engineering: Tuning the Porosity and Composition of the Metal–Organic Framework UiO-66 via Modulated Synthesis. *Chem. Mater.* **2016**, *28*, 3749–3761.
- (3) Zhu, L.; Zhang, D.; Xue, M.; Li, H.; Qiu, S. Direct Observations of the MOF (UiO-66) Structure by Transmission Electron Microscopy. *CrystEngComm* **2013**, *15*, 9356–9359.
- (4) Xiao, B.; Yuan, Q.; Williams, R. A. Exceptional Function of Nanoporous Metal Organic Framework Particles in Emulsion Stabilisation. *Chem. Commun.* **2013**, *49*, 8208–8210.
- (5) Huo, J.; Marcello, M.; Garai, A.; Bradshaw, D. MOF-Polymer Composite Microcapsules Derived from Pickering Emulsions. *Adv. Mater.* **2013**, *25*, 2717–2722.
- (6) Song, P.; Natale, G.; Wang, J.; Bond, T.; Hejazi, H.; Siegler, H. de la H.; Gates, I.; Lu, Q. 2D and 3D Metal–Organic Framework at the Oil/Water Interface: A Case Study of Copper Benzenedicarboxylate. *Adv. Mater. Interf.* **2019**, *6*, 1801139.
- (7) Yang, Z.; Cao, L.; Li, J.; Lin, J.; Wang, J. Facile Synthesis of Cu-BDC/Poly(N-Methylol Acrylamide) HIPE Monoliths via CO<sub>2</sub>-in-Water Emulsion Stabilized by Metal–Organic Framework. *Polymer (Guildf)*. **2018**, *153*, 17–23.
- (8) Liu, C.; Zhang, J.; Zheng, L.; Zhang, J.; Sang, X.; Kang, X.; Zhang, B.; Luo, T.; Tan, X.; Han, B. Metal–Organic Framework for Emulsifying Carbon Dioxide and Water. *Angew. Chem. Int. Ed.* **2016**, *55*, 11372–11376.
- (9) Li, Z.; Zhang, J.; Luo, T.; Tan, X.; Liu, C.; Sang, X.; Ma, X.; Han, B.; Yang, G. High Internal Ionic Liquid Phase Emulsion Stabilized by Metal–Organic Frameworks. *Soft Matter* **2016**, *12*, 8841–8846.
- (10) Lorignon, F.; Gossard, A.; Carboni, M.; Meyer, D. Microstructural and Rheological Investigation of Upcycled Metal–Organic Frameworks Stabilized Pickering Emulsions. *J. Colloid Interface Sci.* **2021**, *586*, 305–314.
- (11) Zhang, F.; Liu, L.; Tan, X.; Sang, X.; Zhang, J.; Liu, C.; Zhang, B.; Han, B.; Yang, G. Pickering Emulsions Stabilized by a Metal–Organic Framework (MOF) and Graphene Oxide (GO) for Producing MOF/GO Composites. *Soft Matter* **2017**, *13*, 7365–7370.
- (12) Zhu, H.; Zhang, Q.; Zhu, S. Assembly of a Metal–Organic Framework into 3 D Hierarchical Porous Monoliths Using a Pickering High Internal Phase Emulsion Template. *Chem. Eur. J.* **2016**, *22*, 8751–8755.
- (13) Ma, P.; Zhang, J.; Teng, Z.; Zhang, Y.; Bauchan, G. R.; Luo, Y.; Liu, D.; Wang, Q. Metal–Organic Framework-Stabilized High Internal Phase Pickering Emulsions Based on Computer Simulation for Curcumin Encapsulation: Comprehensive Characterization and Stability Mechanism. *ACS Omega* **2021**, *6*, 26556–26565.
- (14) Shearer, G. C.; Chavan, S.; Ethiraj, J.; Vitillo, J. G.; Svelle, S.; Olsbye, U.; Lamberti, C.; Bordiga, S.; Lillerud, K. P. Tuned to Perfection: Ironing Out the Defects in Metal–Organic Framework UiO-66. *Chem. Mater.* **2014**, *26*, 4068–4071.
